# Supplementary material for: Understanding the role of spacer cation in 2D layered halide perovskites to achieve stable perovskite solar cells
Source: Royal Society of Chemistry journal article supplement (doi:10.1039/d1ma01135a), 2022-01-01
Supplement: d1ma01135a1.pdf [file d1ma01135a1.pdf]

## Supporting Informataion

### Understanding the Role of Spacer Cation in 2D Layered Halide Perovskites to achieve stable perovskite solar cell

Eti Mahal,<sup>†</sup> Shyama Charan Mandal,<sup>†</sup> Biswarup Pathak,<sup>†,\*</sup>

<sup>†</sup>Department of Chemistry, Indian Institute of Technology Indore, Indore 453552, India

\*Email: [biswarup@iiti.ac.in](mailto:biswarup@iiti.ac.in)

### Contents

**Figure S1:** Optimized geometries of (a) (2-PyrEA)PbI<sub>4</sub>, (b) (3-PyrEA)PbI<sub>4</sub>, (c) (4-PyrEA)PbI<sub>4</sub>

**Table S1:** The detailed structural parameters of 2D-LHPs.

**Table S2:** Bond angle and bond lengths of 2D-LHPs.

**Figure S2:** Structural features of (a) (BA)<sub>2</sub>PbI<sub>4</sub>, (b)(PEA)<sub>2</sub>PbI<sub>4</sub>, (c) (2-PyrEA)PbI<sub>4</sub>, (d) (3-PyrEA)PbI<sub>4</sub> and (e) (4-PyrEA)PbI<sub>4</sub>

**Figure S3:** Projected density of states of (2-PyrEA)PbI<sub>4</sub>, (3-PyrEA)PbI<sub>4</sub> and (4-PyrEA)PbI<sub>4</sub> using HSE06+SOC method

**Figure S4:** Calculated band structures of (2-PyrEA)PbI<sub>4</sub>, (3-PyrEA)PbI<sub>4</sub> and (4-PyrEA)PbI<sub>4</sub> using PBE+SOC method.

**Figure S5:** Calculated band structures of (BA)<sub>2</sub>PbI<sub>4</sub>, (3-APN)<sub>2</sub>PbI<sub>4</sub> and (PEA)<sub>2</sub>PbI<sub>4</sub> using PBE method.

**Figure S6:** Optimized geometries of (a)  $(3\text{-APN})_2\text{SnI}_4$ , (b)  $(3\text{-APN})_2\text{PbBr}_4$ , (c)  $(3\text{-APN})_2\text{PbCl}_4$ .

**Figure S7:** Structural features of (a)  $(3\text{-APN})_2\text{SnI}_4$ , (b)  $(3\text{-APN})_2\text{PbBr}_4$ , (c)  $(3\text{-APN})_2\text{PbCl}_4$ .

**Table S3:** The calculated band gap values of 2D-LHP based systems using PBE and HSE06+SOC functional and compared with the available experimental values.

**Figure S8:** Projected density of states of (a)  $(3\text{-APN})_2\text{SnI}_4$ , (b)  $(3\text{-APN})_2\text{PbBr}_4$ , (c)  $(3\text{-APN})_2\text{PbCl}_4$  using HSE06+SOC method.

**Figure S9:** Calculated band structures of (a)  $(3\text{-APN})_2\text{SnI}_4$ , (b)  $(3\text{-APN})_2\text{PbBr}_4$ , (c)  $(3\text{-APN})_2\text{PbCl}_4$  using PBE+SOC method.

**Table S4:** The calculated effective masses of  $(3\text{-APN})_2\text{SnI}_4$ ,  $(3\text{-APN})_2\text{PbBr}_4$ ,  $(3\text{-APN})_2\text{PbCl}_4$ .

**Figure S10:** Calculated absorption spectra of  $(2\text{-PyrEA})\text{PbI}_4$ ,  $(3\text{-PyrEA})\text{PbI}_4$  and  $(4\text{-PyrEA})\text{PbI}_4$  using PBE+SOC method.

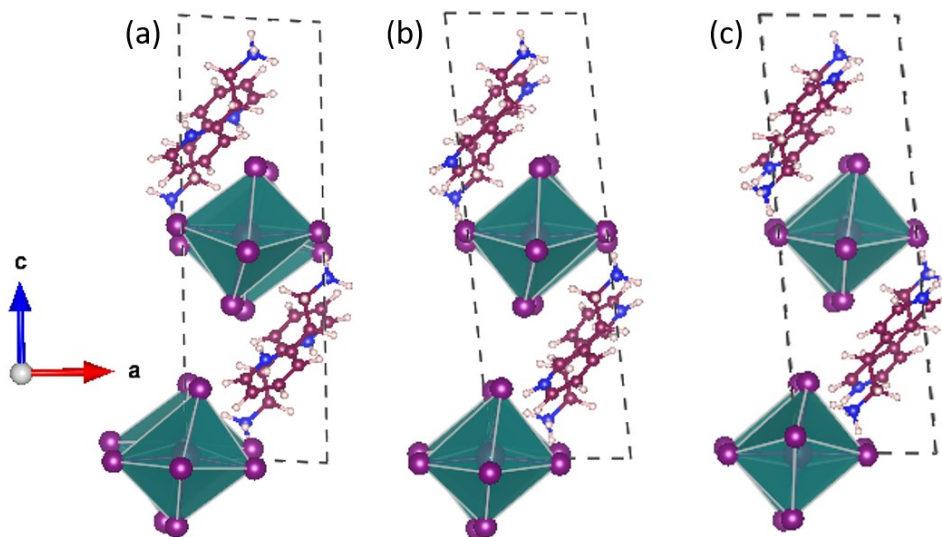

**Figure S1:** Optimized geometries of (a) (2-PyrEA)PbI<sub>4</sub>, (b) (3-PyrEA)PbI<sub>4</sub>, (c) (4-PyrEA)PbI<sub>4</sub>

**Table S1:** Space group and Lattice parameters of 2D-LHPs.

| LHP System                             | Space group | Lattice Parameters |        |        |          |         |          |
|----------------------------------------|-------------|--------------------|--------|--------|----------|---------|----------|
|                                        |             | a (Å)              | b (Å)  | c (Å)  | $\alpha$ | $\beta$ | $\gamma$ |
| (BA) <sub>2</sub> PbI <sub>4</sub>     | Pbca        | 8.876              | 8.693  | 27.601 | 90°      | 90°     | 90°      |
| (3-APN) <sub>2</sub> PbI <sub>4</sub>  | Pnma        | 8.637              | 9.785  | 20.346 | 90°      | 90°     | 90°      |
| (PEA) <sub>2</sub> PbI <sub>4</sub>    | P1          | 8.739              | 8.740  | 32.995 | 84.65°   | 84.66°  | 89.65°   |
| (PyrEA)PbI <sub>4</sub>                | P 21/c      | 6.335              | 12.572 | 19.801 | 90°      | 90°     | 90.76°   |
| (2-PyrEA)PbI <sub>4</sub>              | P 21/n      | 6.398              | 12.522 | 19.959 | 90°      | 93.79°  | 90°      |
| (3-PyrEA)PbI <sub>4</sub>              | P 21/n      | 6.356              | 12.469 | 20.381 | 90°      | 96.06°  | 90°      |
| (4-PyrEA)PbI <sub>4</sub>              | P 21/n      | 6.351              | 12.500 | 20.200 | 90°      | 95.35°  | 90°      |
| (3-APN) <sub>2</sub> SnI <sub>4</sub>  | Pnma        | 8.724              | 10.048 | 21.034 | 90°      | 90°     | 90°      |
| (3-APN) <sub>2</sub> PbBr <sub>4</sub> | Pnma        | 8.071              | 9.294  | 22.588 | 90°      | 90°     | 90°      |
| (3-APN) <sub>2</sub> PbCl <sub>4</sub> | Pnma        | 7.670              | 8.878  | 18.499 | 90°      | 90°     | 90°      |

**Table S2:** Bond angle and bond lengths of 2D-LHPs. Where M and X are metal and halides respectively.

| LHP System                             | M-X bond lengths in Å |       |       |       |       |       | X-M-X angle |        |        |
|----------------------------------------|-----------------------|-------|-------|-------|-------|-------|-------------|--------|--------|
|                                        | 1(Eq)                 | 2(Eq) | 3(Eq) | 4(Eq) | 5(Ax) | 6(Ax) | 1           | 2      | 3      |
| (BA) <sub>2</sub> PbI <sub>4</sub>     | 3.20                  | 3.20  | 3.21  | 3.21  | 3.23  | 3.23  | 180.00      | 179.99 | 180.00 |
| (3-APN) <sub>2</sub> PbI <sub>4</sub>  | 3.35                  | 3.20  | 3.19  | 3.34  | 3.21  | 3.21  | 174.40      | 174.82 | 170.09 |
| (PEA) <sub>2</sub> PbI <sub>4</sub>    | 3.19                  | 3.20  | 3.19  | 3.18  | 3.24  | 3.87  | 179.50      | 179.51 | 179.34 |
| (PyrEA)PbI <sub>4</sub>                | 3.20                  | 3.21  | 3.18  | 3.18  | 3.25  | 3.16  | 172.72      | 169.63 | 167.89 |
| (2-PyrEA)PbI <sub>4</sub>              | 3.17                  | 3.22  | 3.28  | 3.17  | 3.19  | 3.23  | 165.43      | 174.26 | 175.48 |
| (3-PyrEA)PbI <sub>4</sub>              | 3.18                  | 3.19  | 3.16  | 3.22  | 3.20  | 3.20  | 168.35      | 176.86 | 175.08 |
| (4-PyrEA)PbI <sub>4</sub>              | 3.16                  | 3.19  | 3.19  | 3.22  | 3.28  | 3.12  | 175.99      | 176.60 | 173.53 |
| (3-APN) <sub>2</sub> SnI <sub>4</sub>  | 3.73                  | 3.59  | 3.00  | 2.99  | 3.21  | 3.21  | 177.33      | 175.82 | 168.61 |
| (3-APN) <sub>2</sub> PbBr <sub>4</sub> | 3.00                  | 3.03  | 3.17  | 3.10  | 3.06  | 3.06  | 179.34      | 178.86 | 172.45 |
| (3-APN) <sub>2</sub> PbCl <sub>4</sub> | 3.09                  | 3.02  | 2.82  | 2.84  | 2.83  | 2.83  | 171.46      | 173.30 | 170.86 |

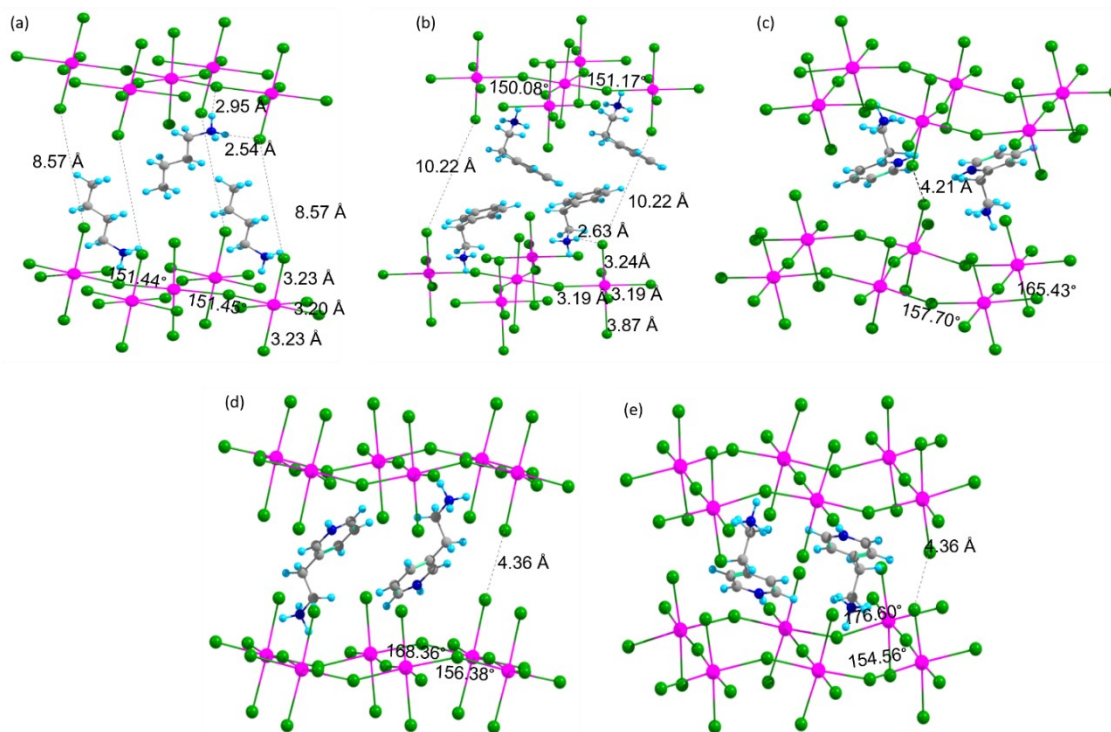

**Figure S2:** Structural features of (a)  $(\text{BA})_2\text{PbI}_4$ , (b)  $(\text{PEA})_2\text{PbI}_4$ , (c)  $(2\text{-PyrEA})\text{PbI}_4$ , (d)  $(3\text{-PyrEA})\text{PbI}_4$  and (e)  $(4\text{-PyrEA})\text{PbI}_4$

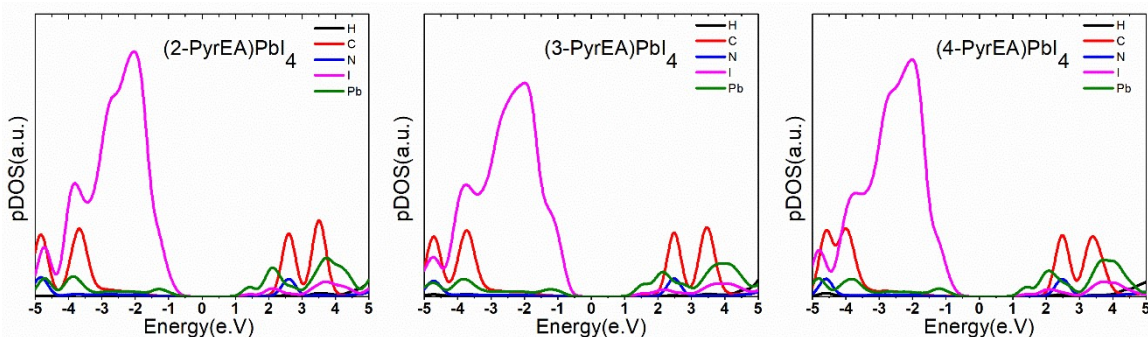

**Figure S3:** Projected density of states of the 2D-LHP systems using HSE06+SOC level of calculations. Here the Fermi level is set to zero.

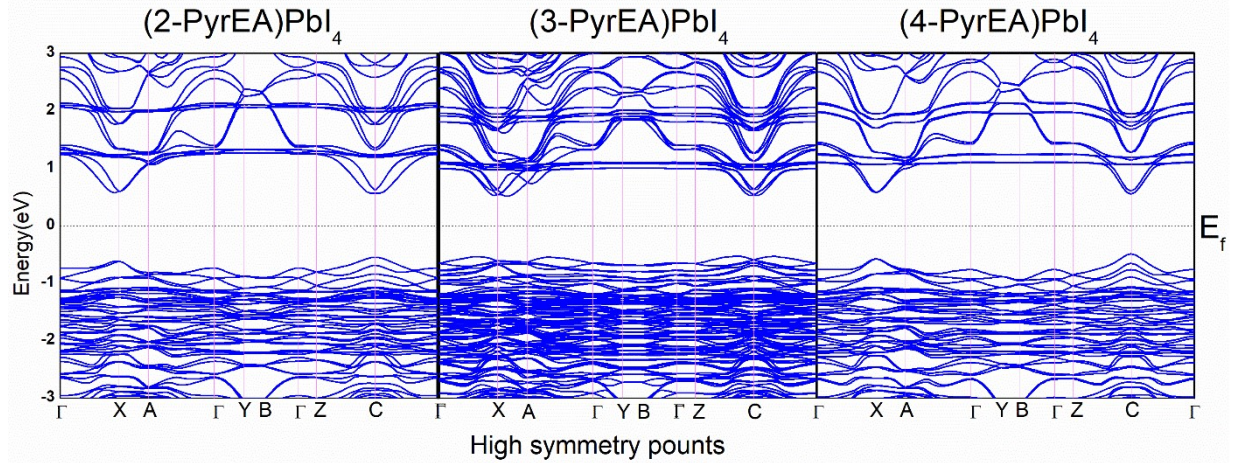

**Figure S4:** Calculated band structures of the 2D-LHP systems using PBE+SOC method. Here, high symmetry points are  $\Gamma = (0, 0, 0)$ ,  $X = (0.5, 0, 0)$ ,  $Y = (0, 0.5, 0)$ ,  $Z = (0, 0, 0.5)$ ,  $A = (0.5, 0.5, 0)$ ,  $B = (0, 0.5, 0.5)$ ,  $C = (0.5, 0, 0.5)$ , and  $D = (0.5, 0.5, 0.5)$ .

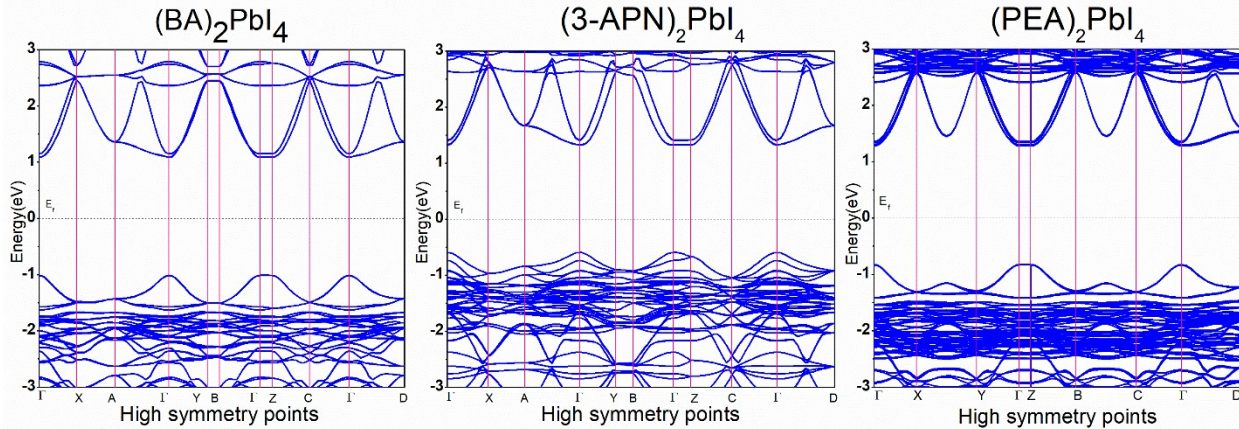

**Figure S5:** Calculated band structures of the 2D-LHP systems using PBE method. Here, high symmetry points are  $\Gamma = (0, 0, 0)$ ,  $X = (0.5, 0, 0)$ ,  $Y = (0, 0.5, 0)$ ,  $Z = (0, 0, 0.5)$ ,  $A = (0.5, 0.5, 0)$ ,  $B = (0, 0.5, 0.5)$ ,  $C = (0.5, 0, 0.5)$ , and  $D = (0.5, 0.5, 0.5)$ .

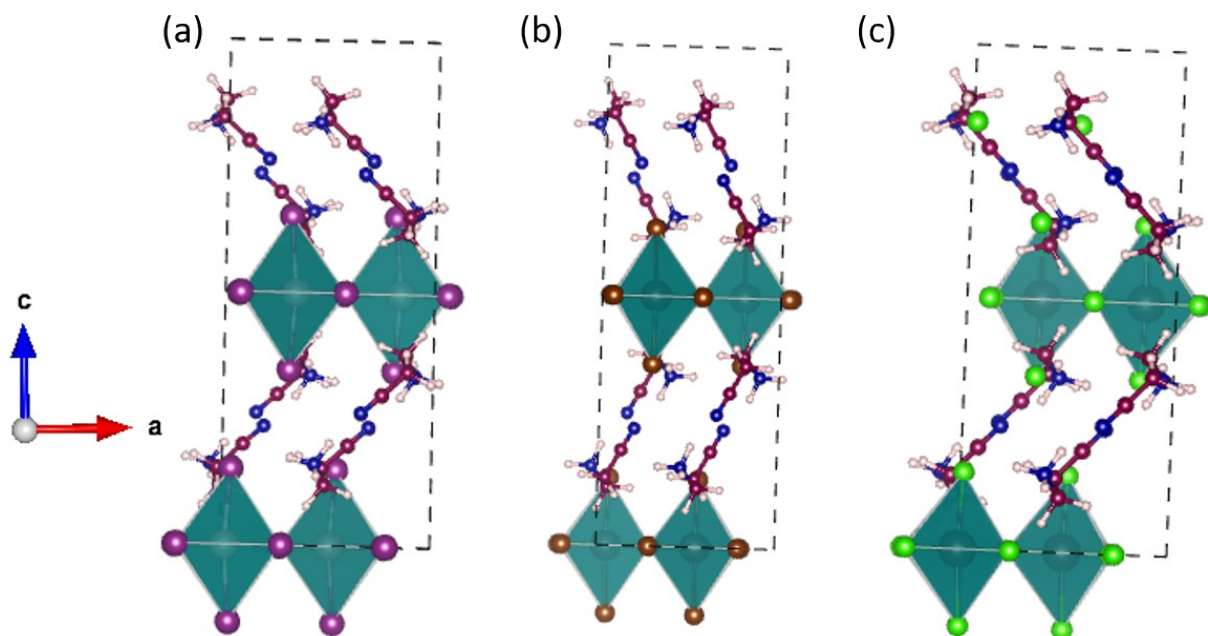

**Figure S6:** Optimized geometries of (a)  $(3\text{-APN})_2\text{SnI}_4$ , (b)  $(3\text{-APN})_2\text{PbBr}_4$ , (c)  $(3\text{-APN})_2\text{PbCl}_4$ .

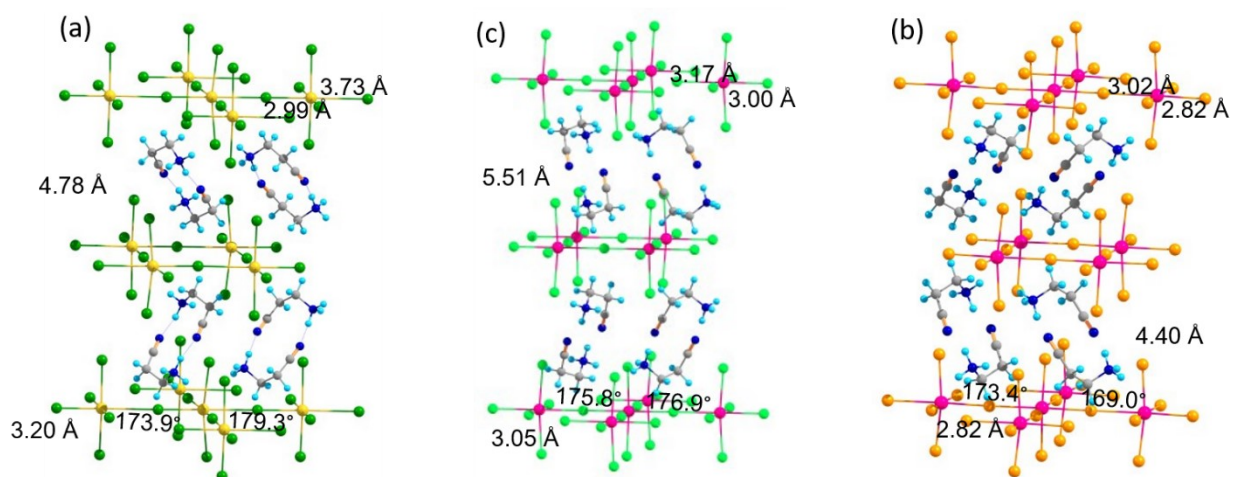

**Figure S7:** Structural features of (a)  $(3\text{-APN})_2\text{SnI}_4$ , (b)  $(3\text{-APN})_2\text{PbBr}_4$ , and (c)  $(3\text{-APN})_2\text{PbCl}_4$ .

**Table S3:** The calculated band gap values of 2D-LHP based systems using PBE and HSE06+SOC functional and compared with the available experimental values.

| Layered Perovskite System       | Band gap in eV |           |       |
|---------------------------------|----------------|-----------|-------|
|                                 | PBE            | HSE06+SOC | Expt. |
| $(3\text{-APN})_2\text{SnI}_4$  | 1.73           | 2.65      | -     |
| $(3\text{-APN})_2\text{PbBr}_4$ | 2.37           | 2.98      | -     |
| $(3\text{-APN})_2\text{PbCl}_4$ | 2.83           | 3.73      | -     |

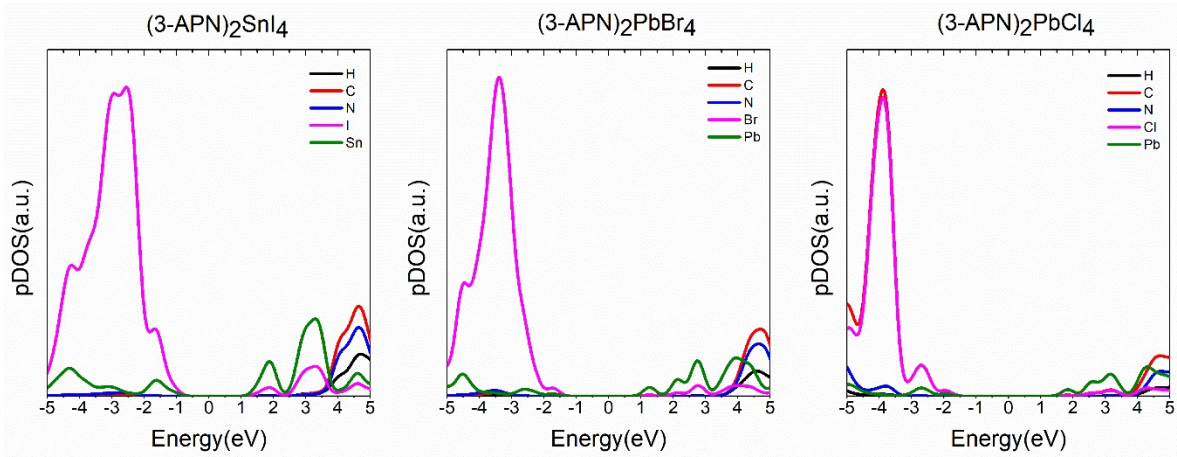

**Figure S8:** Projected density of states of the  $(3\text{-APN})_2\text{SnI}_4$ ,  $(3\text{-APN})_2\text{PbBr}_4$ , and  $(3\text{-APN})_2\text{PbCl}_4$  using HSE06+SOC level of calculations. Here the Fermi level is set to zero.



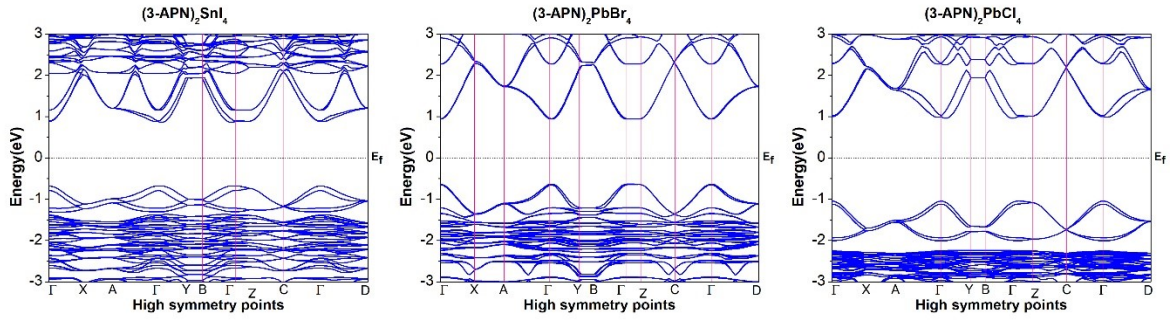

**Figure S9:** Calculated band structures of the  $(3\text{-APN})_2\text{SnI}_4$ ,  $(3\text{-APN})_2\text{PbBr}_4$ , and  $(3\text{-APN})_2\text{PbCl}_4$  using PBE+SOC method. Here, high symmetry points are  $\Gamma = (0, 0, 0)$ ,  $X = (0.5, 0, 0)$ ,  $Y = (0, 0.5, 0)$ ,  $Z = (0, 0, 0.5)$ ,  $A = (0.5, 0.5, 0)$ ,  $B = (0, 0.5, 0.5)$ ,  $C = (0.5, 0, 0.5)$ , and  $D = (0.5, 0.5, 0.5)$ .

**Table S4:** Effective mass of  $(3\text{-APN})_2\text{SnI}_4$ ,  $(3\text{-APN})_2\text{PbBr}_4$ , and  $(3\text{-APN})_2\text{PbCl}_4$ .

| System                          | Direction         | $m_e^*(m_0)$ | $m_h^*(m_0)$ |
|---------------------------------|-------------------|--------------|--------------|
| $(3\text{-APN})_2\text{SnI}_4$  | $\Gamma\text{-X}$ | 0.22         | 0.41         |
|                                 | $\Gamma\text{-Y}$ | 0.95         | 3.81         |
| $(3\text{-APN})_2\text{PbBr}_4$ | $\Gamma\text{-X}$ | 0.19         | 0.27         |
|                                 | $\Gamma\text{-Y}$ | 0.22         | 0.30         |
| $(3\text{-APN})_2\text{PbCl}_4$ | $\Gamma\text{-X}$ | 0.32         | 0.38         |
|                                 | $\Gamma\text{-Y}$ | 0.31         | 0.31         |

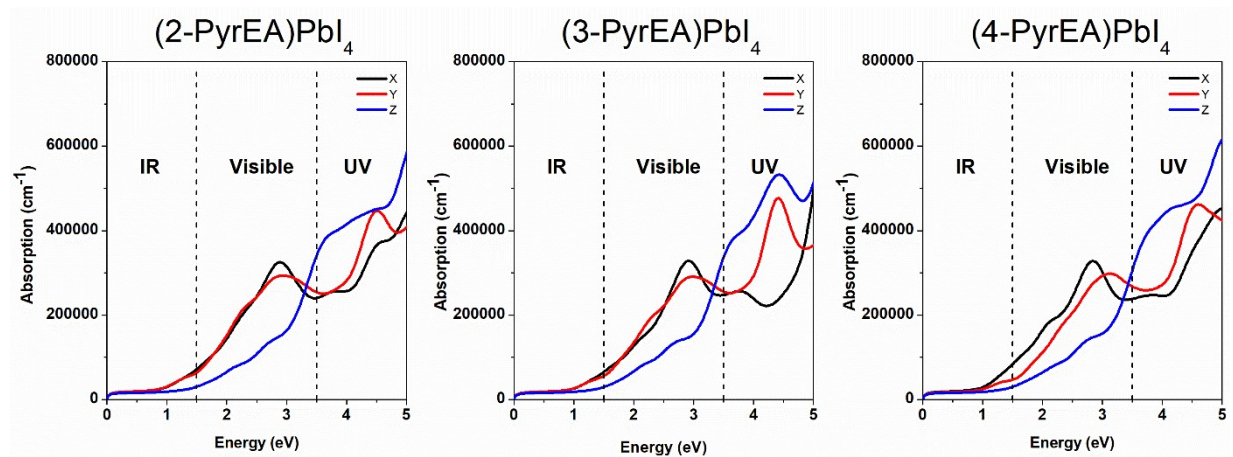

**Figure S10:** Calculated absorption spectra of (2-PyrEA)PbI<sub>4</sub>, (3-PyrEA)PbI<sub>4</sub> and (4-PyrEA)PbI<sub>4</sub> using PBE+SOC method.
